# Supplementary material for: miR29a and miR378b Influence CpG-Stimulated Dendritic Cells and Regulate cGAS/STING Pathway
Source: MDPI journal article supplement (doi:10.3390/vaccines7040197), 2019-11-26
Supplement: s1 [file s1]

**Table S1.** Key Resources

| Reagent or Resources                                                              | Source      | Identifier      |
|-----------------------------------------------------------------------------------|-------------|-----------------|
| <b>FACS Antibodies</b>                                                            |             |                 |
| APC-conjugated monoclonal anti-mouse CD11c                                        | eBioscience | REF: 17-0114-81 |
| PE-conjugated monoclonal anti-mouse CD40 (Clone: 1C10)                            | eBioscience | REF: 12-0401-81 |
| PE-conjugated monoclonal anti-mouse CD80 (Clone: 16-10A1)                         | eBioscience | REF: 12-0801-81 |
| PE-conjugated monoclonal anti-mouse CD86 (Clone: GL1)                             | eBioscience | REF: 12-0862-82 |
| APC-conjugated monoclonal anti-mouse MHC class II (I-A/I-E)<br>Clone: M5/114.15.2 | eBioscience | REF: 17-5321-81 |
| APC-conjugated monoclonal anti-mouse CD273 (B7-DC, PD-L2)<br>Clone: TY25          | eBioscience | Cat: 107210     |
| APC-conjugated monoclonal anti-mouse Siglec-G (Clone: SH2.1)                      | eBioscience | REF: 17-5833-80 |
| <b>WB Antibodies</b>                                                              |             |                 |
| <i>cGAS</i> (MB21D1)                                                              | Bioworld    | BS71168         |
| <i>STING</i> (TMEM173)                                                            | Bioworld    | BS70551         |
| <i>TBK1</i>                                                                       | Bioworld    | BS60714         |
| <i>STAT6</i> (R639)                                                               | Bioworld    | BS1341          |
| <i>p-STAT6</i> (phospho-Y641)                                                     | Bioworld    | BS4187          |
| <i>JNK</i> (P184)                                                                 | Bioworld    | BS1544          |
| <i>p-JNK</i> (phosphor-T183/Y185)                                                 | Bioworld    | BS4322          |
| <i>p38</i> (T175)                                                                 | Bioworld    | BS3567          |
| <i>p-p38</i> (phosphor-Y182)                                                      | Bioworld    | BS4766          |
| <i>GAPDH</i>                                                                      | Bioworld    | AP0063          |
| <i>IRF3</i> (EPR2418Y)                                                            | abcam       | AB68481         |
| <i>IRF7</i> (EPR4718)                                                             | abcam       | AB109255        |
| <i>TRAF6</i>                                                                      | abcam       | AB137452        |
| <b>Vectors and Inhibitors</b>                                                     |             |                 |
| pSilencer4.1 overexpression vector                                                | Invitrogen  | N/A             |
| pMIR-Report luciferase vector                                                     | Ambion      | N/A             |
| pRL-TK luciferase vector                                                          | Ambion      | N/A             |
| microOFFTM mmu-miR-29a-5p inhibitor                                               | RIBOBIO     | miR20004718     |
| microOFFTM mmu-miR-378b inhibitor                                                 | RIBOBIO     | miR212824104115 |
| microOFFTM inhibitor Negative Control                                             | RIBOBIO     | miR02101        |

|                                                                                     |                      |                    |
|-------------------------------------------------------------------------------------|----------------------|--------------------|
| <b>Chemicals, Peptides and Recombinant Proteins</b>                                 |                      |                    |
| <b>CpG oligodeoxynucleotides mouse (1018)</b>                                       | Novus Biologicals    | NBP2-31142         |
| <b>Poly I:C</b>                                                                     | Merck                | N/A                |
| <b>Recombinant murine granulocyte-macrophage colony-stimulating factor (GM-CSF)</b> | Peprotech            | Cat # 214-14-204G  |
| <b>Recombinant murine IL-4</b>                                                      | Peprotech            | Cat # 315-03-204G  |
| <b>X-tremeGENE HP DNA Transfection Reagent</b>                                      | Roche                | REF: 06366546001   |
| <b>Lipofectamine2000</b>                                                            | Invitrogen           | REF: 11668-027     |
| <b>5S rRNA internal control for qPCR</b>                                            | RIBOBIO              | N/A                |
| <b>Bam HI</b>                                                                       | BioLabs New England  | N/A                |
| <b>Hind III</b>                                                                     | BioLabs New England  | N/A                |
| <b>Sac I</b>                                                                        | BioLabs New England  | N/A                |
| <b>Critical Commercial Assays</b>                                                   |                      |                    |
| <b>miDETECT A Track miRNA qRT-PCR Starter kit</b>                                   | RIBOBIO              | Cat # C10712-1     |
| <b>miScript Reverse Transcriptase</b>                                               | Bio-Rad              | N/A                |
| <b>QuantiTect SYBR Green PCR master mix</b>                                         | Qiagen               | N/A                |
| <b>Dual-luciferase reporter assay kit</b>                                           | Promega              | REF: E1910         |
| <b>Mouse TNF-<math>\alpha</math> Elisa Kit</b>                                      | SenBeiJia Biological | REF: SBJ-M0030-96T |
| <b>Mouse IL-12 Elisa Kit</b>                                                        | SenBeiJia Biological | REF: SBJ-M0594-96T |
| <b>Mouse IFN-<math>\beta</math> Elisa Kit</b>                                       | SenBeiJia Biological | REF: SBJ-M0047-96T |
| <b>Mouse MIP-3<math>\alpha</math>/CCL20 Elisa Kit</b>                               | SenBeiJia Biological | REF: SBJ-M0887-96T |
| <b>Software</b>                                                                     |                      |                    |
| <b>FlowJo V10 software</b>                                                          | FlowJo Software      | N/A                |
| <b>ImageJ</b>                                                                       | ImageJ Software      | N/A                |
| <b>GraphPad Prism v6.01</b>                                                         | GraphPad Software    | N/A                |
